# **EXTENSIVE HYBRIDIZATION REVEALS MULTIPLE COLORATION GENES**

## **2 UNDERLYING A COMPLEX PLUMAGE PHENOTYPE**

**4   Stephanie M. Aguillon\*, Jennifer Walsh, and Irby J. Lovette**

**6   Department of Ecology and Evolutionary Biology, Cornell University, Ithaca, NY 14853**

Fuller Evolutionary Biology Program, Cornell Lab of Ornithology, Ithaca, NY 14850

**8   \* Corresponding author: [sma256@cornell.edu](mailto:sma256@cornell.edu)**

# ABSTRACT

Coloration is an important target of both natural and sexual selection. Discovering the genetic basis of color differences can help us to understand how this visually striking phenotype evolves. Hybridizing taxa with both clear color differences and shallow genomic divergences are unusually tractable for associating coloration phenotypes with their causal genotypes. Here, we leverage the extensive admixture between two common North American woodpeckers—yellow-shafted and red-shafted flickers—to identify the genomic bases of six distinct plumage patches involving both melanin and carotenoid pigments. Comparisons between flickers across ~8.5 million genome-wide SNPs show that these two forms differ at only a small proportion of the genome (mean  $F_{ST} = 0.007$ ). Within the few highly differentiated genomic regions, we identify 408 SNPs significantly associated with four of the six plumage patches. These SNPs are linked to multiple genes known to be involved in melanin and carotenoid pigmentation. For example, a gene (CYP2J19) known to cause yellow to red color transitions in other birds is strongly associated with the yellow versus red differences in the wings and tail feathers of these flickers. Additionally, our analyses suggest novel links between known melanin genes and carotenoid coloration. Our finding of patch-specific control of plumage coloration adds to the growing body of literature suggesting color diversity in animals could be created through selection acting on novel combinations of coloration genes.

Keywords: coloration, pigmentation, association mapping, hybrid zone, northern flicker, *Colaptes auratus*

## INTRODUCTION

Coloration is a visually striking and extraordinarily variable phenotype in animals that drives both natural and sexual selection, and ultimately the process of speciation<sup>1-3</sup>. In recent decades, biologists have been increasingly interested in connecting variation in coloration to an underlying genotype, with much of the focus placed on genes of large effect that influence whole-body coloration differences<sup>3-10</sup>. However, in recent years the use of anonymous genomic scans and admixture mapping has facilitated the discovery of genomic regions involved in coloration of smaller, discrete patches on the body<sup>11-16</sup>. Increasing empirical evidence of patch-specific control of coloration suggests extensive phenotypic diversity could be created through selection acting on novel combinations of coloration genes<sup>17-22</sup>.

Low levels of background genomic divergence—either due to experimental crosses, recent speciation, or ongoing introgression—in taxa that differ primarily in color have allowed for identification of candidate coloration genes in numerous systems<sup>6,14,21,23</sup>. However, what we know about the genes involved in coloration varies extensively depending on the type of pigment involved. The pathways involved in melanin coloration (grays, blacks, browns, and dark reds) are better characterized<sup>5</sup>, compared to carotenoid coloration (bright reds, yellows, and oranges) for which only a handful of underlying genes have been identified<sup>24,25</sup>. This difference is due to differences in pigment acquisition—melanins are produced endogenously, while carotenoids must be acquired through the diet and are subsequently biochemically processed<sup>24</sup>—and the ability to study melanins in humans and other model systems<sup>5</sup>.

Birds with low levels of background divergence have served as particularly powerful non-model systems for discovering the genetic bases of melanin and carotenoid

coloration<sup>6,8,11,12,14,18,20,26-28</sup>, as they often exhibit discrete feather patches that differ in color  
 56 and pigment type across the body<sup>19</sup>. Yet, despite the substantial variation in pigmentation  
 across birds, the genetic bases of melanin and carotenoid coloration have only rarely been  
 58 studied together in the same system (but see <sup>11,14,16</sup>), though the genes involved are not  
 currently known to overlap in function or co-localize in the genome<sup>3,5</sup>. Here, we leverage the  
 60 extensive natural phenotypic variation between yellow-shafted (*Colaptes auratus auratus*) and  
 red-shafted (*C. a. cafer<sup>a</sup>*) flickers, common woodpeckers that hybridize in North America<sup>29</sup>, to  
 62 identify the genomic underpinnings of plumage coloration and explore the connections  
 between melanin and carotenoid pigmentation. The two flickers differ in the coloration of six  
 64 distinct feather patches: wings and tail (the eponymous “shaft”), nuchal patch, ear coverts,  
 throat, crown, and male malar stripe (Fig. 1a, Supplementary Table 1)<sup>30</sup>. The pigments  
 66 involved vary depending on the feather patch, with melanins (throat, ear coverts, crown),  
 carotenoids (wings and tail, nuchal patch), and both melanins and carotenoids (male malar  
 68 stripe)<sup>31,32</sup>. Previous molecular work has highlighted the very low baseline genetic divergence  
 between these two taxa<sup>33-38</sup>. Importantly, there is extensive ongoing hybridization and  
 70 backcrossing where the flickers meet in a secondary contact zone in the Great Plains of North  
 America (Supplementary Fig. 1). Admixed and backcrossed hybrids exhibit the full range of  
 72 possible trait combinations across the six feather patches<sup>30,39,40</sup>.

Their combination of low genome-wide divergence, clear phenotypic differences,  
 74 and extensive hybridization makes flickers an exceptional non-model system in which to

<sup>a</sup> Note to reviewers and Editor: The subspecific epithet of the red-shafted flicker is etymologically based on a term referring to an African people that is an extreme racial slur. This nomenclatural history places users of this official Linnaean name in the unfortunate situation of perpetuating this slur. We include the official Linnaean name in this one line, but otherwise purposefully refer to these taxa by their common names. Aguillon and Lovette have elsewhere proposed the scientific name for the red-shafted flicker be changed to *Colaptes auratus lathamii*, but this name is not yet widely accepted<sup>41</sup>.

explore the genomic basis of feather coloration. Further, the variation in both melanin and carotenoid pigmentation provides an opportunity to explore the potential interactions between genes involved in both pigment types. We compare whole genomes of phenotypically admixed individuals from the hybrid zone along with allopatric red-shafted and yellow-shafted individuals. Here, we (1) assess the genomic landscape of divergence between allopatric flickers and (2) capitalize on a dataset of phenotypically variable hybrid flickers to perform association tests between the genomic markers and the six plumage traits. We leverage these complementary and independent approaches to identify regions of the genome significantly associated with plumage differences. We then (3) search for candidate pigmentation genes present within these genomic regions and (4) discuss potential mechanisms connecting melanin and carotenoid genes with individual plumage patches.

## RESULTS & DISCUSSION

### The genomic landscape of divergence in flickers

We conducted whole genome re-sequencing of 10 allopatric red-shafted, 10 allopatric yellow-shafted, and 48 hybrid flickers (Supplementary Table 2), resulting in approximately 8.5 million SNPs distributed across the genome. Red-shafted and yellow-shafted flickers clustered separately in a principal component analysis (PCA) with hybrids extending between the two parental taxa on PC1 (Fig. 1b; 2.02% of the variation) and clustering separately from them on PC3 and PC4 (Supplementary Fig. 2; 1.69% and 1.67% of the variation, respectively). We estimated  $F_{ST}$  values between the allopatric red-shafted and allopatric yellow-shafted individuals in nonoverlapping 25kb

98 windows to search for divergent regions of the genome. Differentiation across all  
 windows was low between the allopatric individuals (mean genome-wide  $F_{ST} = 0.007$ ,  
 100 mean autosomal  $F_{ST} = 0.006$ , mean Z-linked  $F_{ST} = 0.026$ ), but we identified a number of  
 regions with elevated  $F_{ST}$  estimates relative to the background (Fig. 1d). Across the  
 102 entire dataset, we found only a small number of SNPs that were fixed (790 SNPs with  
 $F_{ST} = 1$ , 0.009% of the total) or nearly fixed (2,202 SNPs with  $F_{ST} > 0.90$ , 0.026% of the  
 104 total).

If these highly differentiated regions of the genome contain causal genes related  
 106 to feather coloration, we expected the PCA to be correlated with phenotypic differences.  
 Thus, we scored the six differing plumage patches (Fig. 1a) in the flickers sampled in  
 108 the hybrid zone to obtain a score ranging from 0 (yellow-shafted) to 1 (red-shafted). See  
 Methods and Supplementary Table 1 for details on the phenotypic scoring. We found  
 110 that PC1 was strongly correlated with the overall phenotype score (Fig. 1c,  $\rho = 0.93$ ,  $P <$   
 $2.2 \times 10^{-16}$ ). Further, a PCA based on 790 fixed SNPs between allopatric red-shafted and  
 112 allopatric yellow-shafted flickers resulted in the first PC axis explaining a majority of the  
 variation (55.53%) and individuals spread along PC1 based on overall phenotype score  
 114 (Supplementary Fig. 3). Taken together, these findings suggest that the few divergent  
 genomic regions between allopatric flickers ( $F_{ST}$  peaks in Fig. 1d) are associated with  
 116 the loci responsible for their coloration differences.

# 118 **Multiple, discrete genomic regions shape the complex plumage phenotype**

We took advantage of the plumage trait variation among hybrid flickers to conduct  
 120 genome-wide associations (GWAs) for each of the six plumage patches to test whether

particular  $F_{ST}$  divergence peaks were associated with plumage coloration. By focusing  
 122 only on hybrid individuals, the results of our GWA analyses are independent from our  
 assessment of genomic divergence between allopatric individuals. Because red-shafted  
 124 and yellow-shafted flickers are highly ecologically similar<sup>29</sup> and hybrid flickers with  
 variable trait combinations were sampled from the same geographic transect, we expect  
 126 any associations identified in the GWAs to be related to differences in plumage  
 coloration traits. 408 SNPs (0.005% of the total) were significantly associated with  
 128 plumage patches using a significance threshold of  $\alpha = 0.0000001$  ( $-\log_{10}(\alpha) = 7$ ), with 25  
 SNPs identified in more than one analysis (Fig. 2; Supplementary Fig. 4). We found  
 130 significant associations between multiple SNPs and plumage for four of the six focal  
 traits, excluding throat color (only 1 SNP identified) and crown color (no SNPs  
 132 identified). We validated our associations to ensure the identified regions represent real  
 associations between plumage patches and genotype using randomized GWA analyses  
 134 (Supplementary Fig. 5; see Methods for details).

The GWA analyses revealed several genomic regions that were significantly  
 136 associated with the coloration of the wings and tail, nuchal patch, ear coverts, and male  
 malar stripe (Fig. 2; Supplementary Table 3). In several cases, we identified regions of  
 138 the genome that were significantly associated with multiple plumage traits (e.g., at the  
 end of chromosome 1 and the beginning of chromosome 3). However, we also identified  
 140 regions of the genome that were unique to a single GWA analysis (e.g., associations  
 between wings and tail color and regions on chromosomes 5, 8, and 12). These findings  
 142 suggest multiple mechanisms influencing coloration in flickers: some genomic regions  
 exert pleiotropic control over the coloration of multiple plumage patches, while other

genomic regions control the coloration of a single plumage patch (perhaps as loci of large effect). By taking complementary, yet independent, approaches in the GWAs and  $F_{ST}$  analyses, we find that genomic regions identified in the GWAs of hybrid flickers largely lie within regions of the genome with elevated  $F_{ST}$  between allopatric flickers (peaks in Fig. 1d; Supplementary Fig. 6). However, not all genomic regions with elevated  $F_{ST}$  were associated with variation in coloration (e.g., the first peak on chromosome 4A, the peak on chromosome 10, and multiple peaks on the Z chromosome).

# **Melanin and carotenoid genes both associate with carotenoid plumage in flickers**

To identify candidate genes associated with plumage variation, we searched for all genes within 20kb of genomic regions that were significantly associated with plumage patches (i.e., within the regions identified in Supplementary Table 3). Using this approach, we identified a total of 128 genes (Supplementary Table 4). Here, we highlight 13 genes (Table 1, Fig. 3) that are known or suspected to be involved in melanin or carotenoid pigmentation in other systems: 7 of these candidates are known to be directly involved with pigmentation<sup>6,8,42</sup>, 4 are suspected to be involved in pigmentation based on the function of related genes<sup>8</sup>, and 2 were identified in previous associations with feather coloration in birds<sup>11,26</sup>.

We find a strong association between wings and tail color and the genomic region on chromosome 8 containing the gene CYP2J19 (Fig. 3c, Table 1), which codes for a cytochrome P450 enzyme. CYP2J19 upregulation via an introgressed variant is causal in changing the typical yellow-feathered canary (*Serinus canaria*) into the “red



factor” canary<sup>6</sup> and the lack of a functional copy in zebra finch (*Taeniopygia guttata*) is implicated in the “yellowbeak” phenotype in which the normally red beak and legs are instead yellow<sup>42</sup>. It is currently one of only two genes known to be involved in red coloration in birds, but evidence of its functioning in natural systems is still limited (but see <sup>43-45</sup>). Our identification of CYP2J19 in the GWA for wings and tail coloration suggests that it mediates this yellow versus red trait difference in flickers and provides further support for its importance in red coloration across diverse avian lineages.

The majority of our identified candidate genes for carotenoid plumage patches in the flickers (Table 1) are known or suspected to affect melanin pigmentation in other organisms (henceforth “melanin genes”). In some cases, we find melanin genes are associated with both melanin and carotenoid traits in a single region of the genome (EED on chromosome 1 (Fig. 3a), PLCB1 and PLCB4 on chromosome 3 (Fig. 3b), and MFSD12 (Fig. 3e) and FKBP8, RAM8A, and MYO9B (Fig. 3f) on chromosome 28), while in other cases, we find melanin genes associated with a single trait (malar stripe that uses both pigment types (PAM (Fig. 3g), APC (Fig. 3h), and RGP1 (Fig. 3i) on the Z chromosome). Most unusually, we identify a region on chromosome 12 associated only with differences in wings and tail color—a carotenoid-based trait—that contains CAMKV and SEMA3B (Fig. 3d), which are both related to known melanin pathway gene families. To our knowledge, of these 12 melanin genes only APC has previously been linked to carotenoid pigmentation (in an associational study)<sup>12</sup>, in addition to its known link to melanin pigmentation<sup>8</sup>.

## Potential mechanisms linking melanin genes with carotenoid traits

Melanin and carotenoid pigmentation derive from different biochemical pathways<sup>46</sup> and the genes involved in the different processes are not currently known to co-localize in the genome or exert influence over each other<sup>3,5</sup>. Thus, our finding in flickers of repeated associations between different carotenoid traits and melanin genes was unexpected. Although we lack a complete annotation of the flicker reference genome and therefore may have missed some causal genes, we repeatedly found associations between known carotenoid traits and melanin genes from different regions of the genome. Here, we outline three non-mutually exclusive explanations for these associations that link melanin genes with carotenoid plumage.

First, melanin genes could be associated with carotenoid traits because the trait differences we observe are actually due to a combination of both pigments. Melanin genes associated with the male malar stripe (Fig. 3b, Fig. 3f-i) exemplify this mechanism: red pigments are present in the malar stripes of both red-shafted and yellow-shafted flickers, and yellow-shafted flickers subsequently overlay melanin to produce a black malar stripe that masks the red pigment<sup>31,47</sup>. Beyond this one situation where melanic pigments completely overlay a carotenoid trait, it is also possible that the two pigments are used in concert within the feathers to produce the observed color (as in <sup>48,49</sup>). Additionally, melanins serve a number of other functions in feathers apart from coloration (e.g., feather structure and stability<sup>50,51</sup>, UV protection<sup>52</sup>, resistance to bacterial degradation<sup>53</sup>), so differences in the feathers beyond coloration could also exist.

Second, some of the association patterns we identify in the GWAs suggest pleiotropic effects of melanin genes: we find multiple plumage patches (carotenoid and

melanin) associated with the same region of the genome (Fig. 3a-b, Fig. 3e-f). Because  
 214 we find different combinations of traits associated with different genomic regions—  
 rather than overlapping patterns across all analyses—the results support some genomic  
 216 regions exerting control over multiple plumage patches. This could occur through  
 regulatory genes typically involved in melanin pigmentation evolving to control the  
 218 expression of both melanins and carotenoids. Similar results have been found in two  
 different warbler species (*Setophaga*), where associations between a single genomic  
 220 region and multiple aspects of carotenoid and melanin plumage differences have been  
 identified<sup>11,16</sup>. The finding of pleiotropic effects on melanin and carotenoid plumage in  
 222 woodpeckers and warblers, distantly related bird taxa, suggests pleiotropic effects of  
 melanin genes may be widespread.

224 Finally, our results suggest the intriguing possibility that genes typically thought  
 to be involved in melanin pigmentation could also be used in creating carotenoid traits.  
 226 In particular, the association between wings and tail color with CAMKV and SEMA3B  
 (Fig. 3d), suggests the potential for melanin genes to play a role in carotenoid traits.  
 228 Rather than controlling the upregulation and deposition of melanin (as in our first  
 explanation), these genes may instead control the absence of melanin within the  
 230 feathers, as a reduction of melanin is necessary for the bright red and yellow coloration  
 to be visible. It is possible that the two taxa have differential levels of melanin reduction  
 232 or that they use different molecular pathways. This finding opens up a novel area of  
 inquiry aimed at understanding the interactions between melanin genes and the  
 234 production and display of carotenoid traits. Exploring differences in gene expression in

these colored feather patches could help to better understand the mechanisms

underlying these associations.

## Conclusions

Here, we identify a complex relationship linking melanin and carotenoid genes with modular plumage patches. We provide evidence for a novel link between known melanin genes and carotenoid traits. Additionally, we identified CYP2J19 as a strong candidate related to red versus yellow coloration differences, providing further evidence of its action across divergent bird lineages. The extensive hybridization between red-shafted and yellow-shafted flickers, in combination with their clear phenotypic differences, has allowed us to separately connect phenotypic differences with individual genomic regions. The patch-specific control of plumage coloration that we identify here, and increasingly found in other systems<sup>19</sup>, suggests color diversity across birds could be created through selection to produce novel combinations of coloration genes each exerting control on a separate body patch.

## METHODS

### Sample collection and plumage scoring

We obtained tissue samples from allopatric yellow-shafted flickers from New York ( $N = 5$ ) and Florida ( $N = 5$ ), and allopatric red-shafted flickers from Oregon ( $N = 5$ ) and California ( $N = 5$ ). These allopatric samples allowed us to characterize genomic differentiation between the flickers far from the region of current hybridization. Additionally, we sampled flickers with variable phenotypes ( $N = 48$ ) from a sampling

transect across the hybrid zone in Nebraska and Colorado following the Platte River.  
See Supplementary Table 2 for details on included samples.

Red-shafted and yellow-shafted flickers differ in color across six distinct plumage characters: wings and tail, nuchal patch, crown, ear coverts, throat, and male malar stripe (Fig. 1a)<sup>29</sup>. Hybrids exhibit various combinations of parental traits and traits intermediate to the parental traits. We scored plumage characters on a scale from 0 (pure yellow-shafted) to 4 (pure red-shafted) following a protocol slightly modified from Short<sup>30</sup> (Supplementary Table 1). We additionally calculated an overall phenotype score by adding the scores for the six individual traits and standardizing to range from 0 to 1 to include both sexes (as all females lack a malar stripe). To ensure consistency, all scoring was conducted by a single individual (SMA). Hybrid flickers were chosen for genotyping in this study to maximize power in the GWA analyses: we selected a panel of hybrids that exhibited high variation in their combination of plumage traits.

## Reference genome assembly and annotation

We sequenced and assembled the genome of a male yellow-shafted flicker (CUMV 57446). DNA was extracted using the Gentra Puregene Tissue Kit following the manufacturer's protocol (Qiagen, California, USA) to isolate high molecular weight DNA. Three libraries were prepared and sequenced by the Cornell Weill Medical College genomics core facility—one 180bp fragment library and two mate-pair libraries (3kb and 8kb insert size)—across three lanes of an Illumina HiSeq2500 using the rapid run mode. The two mate-pair libraries were multiplexed on a single lane, while the fragment library

was run across two lanes. The three lanes of sequencing generated ~481 million raw paired-end reads.

We assembled the reference genome using ALLPATHS-LG v.52488<sup>54</sup> and assessed the quality of the assembly using QUAST v.4.0<sup>55</sup> and BUSCO v.3.1.0<sup>56</sup>. The reference assembly had a total length of 1.10 Gb distributed across 22,654 scaffolds with an N50 of 1.57 Mb. Using BUSCO, we searched for a set of 2,586 conserved, single-copy orthologs found across vertebrates. Our flicker reference genome contained a single, complete copy of 87.2% of these genes and a fragment of an additional 6.7%. Of the remaining genes, 0.4% were identified multiple times and 5.7% were completely missing. To obtain more precise information on chromosome position, we additionally assigned individual scaffolds to chromosomes based on assignments in the Ensembl zebra finch (*Taeniopygia guttata*) reference genome v.3.2.4 release 91<sup>57</sup> using the 'Chromosemble' function in Satsuma<sup>58</sup>.

We annotated the reference genome using the MAKER v.2.31 pipeline<sup>59</sup>. We first used RepeatModeler v.1.0<sup>60</sup> to generate a library of repetitive sequences present in the assembly and RepeatMasker v.4.0<sup>61</sup> to soft mask these repeats. We then produced gene models by running two iterations of MAKER: the first iteration produces ab initio gene predictions, while the second iteration uses the gene models predicted from the first to improve performance. We used the Ensembl expressed sequence tags (ESTs) and protein database from the zebra finch (v.3.2.4 downloaded July 2017)<sup>57</sup> to train MAKER. This pipeline annotated a total of 12,141 genes (62.4% of the total). 97.3% of the proteins predicted by MAKER matched zebra finch proteins using BLAST<sup>62</sup>.

# **Low coverage re-sequencing and variant discovery**

We performed low coverage re-sequencing of the genomes of 68 flickers. Genomic DNA was extracted from each sample using DNeasy blood and tissue extraction kits (Qiagen, California, USA) and DNA concentrations were determined using a Qubit fluorometer (Life Technologies, California, USA). We used 200 ng of DNA from each sample to prepare individually barcoded libraries with a 550bp insert size following the protocol for the TruSeq Nano DNA Library Prep kit (Illumina, California, USA). The libraries were pooled into three groups and sequenced separately on an Illumina NextSeq500 lane (2×150bp) at the Cornell University Biotechnology Resource Center.

We assessed the quality of individual libraries using FastQC v.0.11.5 (<http://www.bioinformatics.babraham.ac.uk/projects/fastqc/>) and subsequently performed trimming, adapter removal, and initial quality filtering using AdapterRemoval v.2.1.1<sup>63</sup>. We required a minimum Phred quality score of 10 and merged overlapping paired-end reads. Filtered sequences were aligned to the northern flicker reference genome using Bowtie2 v.2.2.8<sup>64</sup> with the very sensitive, local option. Alignment statistics were obtained from Qualimap v.2.2.1<sup>65</sup>; the average alignment rate across all samples was 92.3%. Alignment rates were comparable across the different taxa: red-shafted flickers (91.9%), yellow-shafted flickers (91.8%), and hybrid flickers (92.6%). After filtering and aligning to the reference, the mean depth of coverage was 5.8X (range: 2.0X – 15.1X).

All resulting SAM files were converted to BAM files, sorted, and indexed using SAMtools v.1.3<sup>66</sup>. We used Picard Tools v.2.8.2 (<https://broadinstitute.github.io/picard/>) to mark PCR duplicates and subsequently realigned around indels and fixed mate-pairs

using GATK v.3.8.1<sup>67</sup>. Variant discovery and genotyping for the 68 flickers was performed using the unified genotyper module in GATK. We used the following hard filtering parameters to remove variants from the output file: QD < 2.0, FS > 40.0, MQ < 20.0, and HaplotypeScore > 12.0. Subsequently, we filtered out variants that were not biallelic, had a minor allele frequency less than 5%, had a mean depth of coverage less than 3X or greater than 50X, and had more than 20% missing data across all individuals in the dataset. This pipeline produced 8,495,326 SNPs genotyped across all 68 flickers. We repeated the analyses with a variety of other SNP calling tools, including ANGSD<sup>68</sup> and the haplotype caller module in GATK<sup>67</sup>. We obtained qualitatively similar results across all analyses, and so here choose to present results from SNP calling with unified genotyper in GATK.

### **Population genomic analyses**

We visualized genetic clustering in the SNP dataset by performing a principal component analysis (PCA) using the ‘snpgdsPCA’ function in the SNPRelate package<sup>69</sup> in R v.3.5.2<sup>70</sup>. We characterized genome-wide patterns of divergence between allopatric red-shafted and allopatric yellow-shafted flickers by calculating  $F_{ST}$  using VCFtools v.0.1.16<sup>71</sup> across 5 and 25 kb windows and individual SNPs. We visualized the results using the ‘manhattan’ function in the qqman package<sup>72</sup> in R. Additionally, we used VCFtools to calculate nucleotide diversity, heterozygosity, and Tajima’s D (Supplementary Table 5).

### **Genotype-phenotype associations**



We used GEMMA v.0.98 (Genome-wide Efficient Mixed Model Association)<sup>73</sup> to

associate genotypic variation at SNPs with variation in the six plumage traits for the 48 hybrid flickers while controlling for levels of relatedness. The GEMMA analysis requires a complete SNP dataset, so we first used BEAGLE v.4.1<sup>74</sup> to impute missing data in the dataset. We transformed the imputed dataset into binary PLINK BED format using VCFtools v.0.1.16<sup>71</sup> and PLINK v.1.09<sup>75</sup>. We calculated a relatedness matrix in GEMMA using the centered relatedness matrix option (-gk 1). We conducted separate univariate linear mixed models for each phenotypic trait and used the Wald test (-lmm 1) with a significance threshold of  $\alpha = 0.0000001$  ( $-\log_{10}(\alpha) = 7$ ) to identify significant associations between SNPs and phenotypes. To visualize the results, we used the 'manhattan' function in the qqman package<sup>72</sup> in R.

To validate the resulting associations, we also repeated the GEMMA analysis using a dataset with randomized phenotypes. Instead of generating artificial phenotypic scores, we retained the true phenotypic scoring across all plumage traits, but randomized the individual assignment. If the GEMMA analysis was identifying real associations between genotype and phenotype, we expected few SNPs to exceed our significance threshold in this randomized analysis. In strong contrast to the non-randomized results, we found only six significant SNPs across the six randomized analyses and no clustering of significant SNPs in any genomic region (Supplementary Fig. 5).

## Functional characterization of candidate genes

We compiled a list of genes within a 20 kb buffer of SNPs significantly associated with  
 372 phenotype using Geneious v.11.1.5<sup>76</sup>. To characterize putative candidate genes, we  
 used ontology information from the zebra finch Ensembl database<sup>57</sup> and functional  
 374 information from the Uniprot database<sup>77</sup>. We additionally compared the identified list of  
 genes to known genes involved in pigmentation. We were able to compare our gene list  
 376 to 428 genes known to be involved in melanin pigmentation<sup>8</sup>, and searched for the three  
 gene families known to be involved in carotenoid pigmentation ( $\beta$ -carotene oxygenases,  
 378 scavenger receptors, and cytochrome P450s)<sup>24</sup> and genes identified in recent analyses  
 of pigmentation in other bird species<sup>11,12,14,16,26</sup>.

## ACKNOWLEDGMENTS

382 SMA would like to acknowledge the pivotal role the late Richard G. Harrison played in  
 developing her dissertation project. The authors thank the Cornell University Museum of  
 384 Vertebrates, Burke Museum, and Louisiana State Museum of Natural Science for  
 contributing samples for this work, as well as the many collectors who contribute  
 386 samples to museums. We thank V. G. Rohwer for collecting many of the samples used  
 in this study and for coordinating field work logistics. B. Mims, N. A. Kramer, and T.  
 388 Brooks assisted with field work. We thank B. G. Butcher for guidance and assistance  
 with laboratory work, L. Campagna for assistance with reference genome sequencing  
 390 and assembly, and D. P. L. Toews for input on bioinformatics analyses. We appreciate  
 the insightful comments provided by members of the Fuller Evolutionary Biology  
 392 Program, L. Campagna, G. Hill, J. Hudon, N. Justyn, M. Powers, and D. P. L. Toews on

earlier versions of this manuscript. We thank Megan Bishop for providing illustrations of  
the flickers.

## **FUNDING**

This work was supported by the Cornell Lab of Ornithology Athena Fund, the Garden  
Club of America Frances M. Peacock Scholarship, the Cornell University EEB Richard  
G. Harrison Fund, the Cornell University EEB Betty Miller Francis Fund, the Cornell  
University Andrew W. Mellon Student Research Grant, and the Cornell Sigma Xi  
chapter (all to SMA). SMA was supported by the US National Science Foundation  
Graduate Research Fellowship Program (DGE-1144153) and the AAUW American  
Dissertation Fellowship.

## **DATA AVAILABILITY**

Reference genome and re-sequencing data will be made available upon manuscript  
acceptance. Scripts for analyses are available at: [https://github.com/stephanie-](https://github.com/stephanie-aguillon/flicker-WGS)  
[aguillon/flicker-WGS](https://github.com/stephanie-aguillon/flicker-WGS).

## **AUTHOR CONTRIBUTIONS**

SMA and IJL conceived the study. SMA collected the data. SMA analyzed the data with  
input from JW. SMA, JW, and IJL wrote and reviewed the manuscript.

## REFERENCES

- 1 Cuthill, I. C. *et al.* The biology of color. *Science* **357**, eaan0221 (2017).
- 2 Hill, G. E. & McGraw, K. J. *Bird Coloration: Function and Evolution*. Vol. 2 (Harvard University Press, 2006).
- 3 Orteu, A. & Jiggins, C. D. The genomics of coloration provides insights into adaptive evolution. *Nat. Rev. Genet.* (2020).
- 4 Hoekstra, H. E., Hirschmann, R. J., Bunday, R. A., Insel, P. A. & Crossland, J. P. A single amino acid mutation contributes to adaptive beach mouse color pattern. *Science* **313**, 101-104 (2006).
- 5 Hubbard, J. K., Uy, J. A., Hauber, M. E., Hoekstra, H. E. & Safran, R. J. Vertebrate pigmentation: from underlying genes to adaptive function. *Trends Genet.* **26**, 231-239 (2010).
- 6 Lopes, R. J. *et al.* Genetic basis for red coloration in birds. *Curr. Biol.* **26**, 1427-1434 (2016).
- 7 Mundy, N. I. A window on the genetics of evolution: MC1R and plumage colouration in birds. *Proc. Biol. Sci.* **272**, 1633-1640 (2005).
- 8 Poelstra, J. W., Vijay, N., Hoepfner, M. P. & Wolf, J. B. Transcriptomics of colour patterning and coloration shifts in crows. *Mol. Ecol.* **24**, 4617-4628 (2015).
- 9 San-Jose, L. M. & Roulin, A. Genomics of coloration in natural animal populations. *Phil. Trans. R. Soc. B Biol. Sci.* **372**, 20160337 (2017).
- 10 Uy, J. A. *et al.* Mutations in different pigmentation genes are associated with parallel melanism in island flycatchers. *Proc. Biol. Sci.* **283**, 20160731 (2016).

- 436 11 Brelsford, A., Toews, D. P. L. & Irwin, D. E. Admixture mapping in a hybrid zone  
reveals loci associated with avian feather coloration. *Proc. Biol. Sci.* **284**,  
438 20171106 (2017).
- 12 Gao, G. *et al.* Comparative genomics and transcriptomics of *Chrysolophus*  
440 provide insights into the evolution of complex plumage coloration. *Gigascience* **7**,  
giy113 (2018).
- 442 13 Kim, K. W. *et al.* Genetics and evidence for balancing selection of a sex-linked  
colour polymorphism in a songbird. *Nat. Commun.* **10**, 1852 (2019).
- 444 14 Toews, D. P. *et al.* Plumage genes and little else distinguish the genomes of  
hybridizing warblers. *Curr. Biol.* **26**, 2313-2318 (2016).
- 446 15 Toomey, M. B. *et al.* A non-coding region near Follistatin controls head colour  
polymorphism in the Gouldian finch. *Proc. Biol. Sci.* **285**, 20181788 (2018).
- 448 16 Wang, S. *et al.* Selection on a pleiotropic color gene block underpins early  
differentiation between two warbler species. Preprint at  
450 <https://doi.org/10.1101/853390> (2019).
- 17 Mazo-Vargas, A. *et al.* Macroevolutionary shifts of WntA function potentiate  
452 butterfly wing-pattern diversity. *Proc. Natl. Acad. Sci. USA* **114**, 10701-10706  
(2017).
- 454 18 Campagna, L. *et al.* Repeated divergent selection on pigmentation genes in a  
rapid finch radiation. *Sci. Adv.* **3**, e1602404 (2017).
- 456 19 Funk, E. R. & Taylor, S. A. High-throughput sequencing is revealing genetic  
associations with avian plumage color. *Auk* **136**, 1-7 (2019).

458 20 Stryjewski, K. F. & Sorenson, M. D. Mosaic genome evolution in a recent and  
rapid avian radiation. *Nat. Ecol. Evol.* **1**, 1912-1922 (2017).

460 21 Van Belleghem, S. M. *et al.* Complex modular architecture around a simple  
toolkit of wing pattern genes. *Nat. Ecol. Evol.* **1**, 0052 (2017).

462 22 Zhang, L., Mazo-Vargas, A. & Reed, R. D. Single master regulatory gene  
coordinates the evolution and development of butterfly color and iridescence.  
464 *Proc. Natl. Acad. Sci. USA* **114**, 10707-10712 (2017).

23 Rodriguez, A., Mundy, N. I., Ibanez, R. & Prohl, H. Being red, blue and green: the  
466 genetic basis of coloration differences in the strawberry poison frog (*Oophaga*  
*pumilio*). *BMC Genomics* **21**, 301 (2020).

468 24 Toews, D. P., Hofmeister, N. R. & Taylor, S. A. The Evolution and Genetics of  
Carotenoid Processing in Animals. *Trends Genet.* **33**, 171-182 (2017).

470 25 Walsh, N., Dale, J., McGraw, K. J., Pointer, M. A. & Mundy, N. I. Candidate  
genes for carotenoid coloration in vertebrates and their expression profiles in the  
472 carotenoid-containing plumage and bill of a wild bird. *Proc. Biol. Sci.* **279**, 58-66  
(2012).

474 26 Abolins-Abols, M. *et al.* Differential gene regulation underlies variation in melanic  
plumage coloration in the dark-eyed junco (*Junco hyemalis*). *Mol. Ecol.* **27**, 4501-  
476 4515 (2018).

27 Cooke, T. F. *et al.* Genetic Mapping and Biochemical Basis of Yellow Feather  
478 Pigmentation in Budgerigars. *Cell* **171**, 427-439 e421 (2017).

28 Gazda, M. A. *et al.* A genetic mechanism for sexual dichromatism in birds.  
480 *Science* **368**, 1270-1274 (2020).

- 29 Wiebe, K. L. & Moore, W. S. Northern Flicker (*Colaptes auratus*) in *The Birds of*  
482 *North America* (Cornell Lab of Ornithology, 2017).
- 30 Short, L. L. Hybridization in the flickers (*Colaptes*) of North America. *Bull. Am.*  
484 *Mus. Nat. Hist. N. Y.* **129**, 307-428 (1965).
- 31 Hudon, J., Wiebe, K. L., Pini, E. & Stradi, R. Plumage pigment differences  
486 underlying the yellow-red differentiation in the Northern Flicker (*Colaptes*  
*auratus*). *Comp. Biochem. Phys. B* **183C**, 1-10 (2015).
- 488 32 Wiebe, K. L. & Vitousek, M. N. Melanin plumage ornaments in both sexes of  
Northern Flicker are associated with body condition and predict reproductive  
490 output independent of age. *Auk* **132**, 507-517 (2015).
- 33 Aguillon, S. M., Campagna, L., Harrison, R. G. & Lovette, I. J. A flicker of hope:  
492 Genomic data distinguish Northern Flicker taxa despite low levels of divergence.  
*Auk* **135**, 748-766 (2018).
- 494 34 Fletcher, S. D. & Moore, W. S. Further analysis of allozyme variation in the  
Northern Flicker, in comparison with mitochondrial DNA variation. *Condor* **94**,  
496 988-991 (1992).
- 35 Grudzien, T. A. & Moore, W. S. Genetic differentiation between the yellow-  
498 shafted and red-shafted subspecies of the northern flicker. *Biochem. Syst. Ecol.*  
**14**, 451-453 (1986).
- 500 36 Grudzien, T. A., Moore, W. S., Cook, J. R. & Tagle, D. Genic population structure  
and gene flow in the northern flicker (*Colaptes auratus*) hybrid zone. *Auk* **104**,  
502 654-664 (1987).

- 37 Manthey, J. D., Geiger, M. & Moyle, R. G. Relationships of morphological groups  
504 in the northern flicker superspecies complex (*Colaptes auratus* & *C. chrysoides*).  
*Syst. Biodivers.* **15**, 183-191 (2017).
- 506 38 Moore, W. S., Graham, J. H. & Price, J. T. Mitochondrial DNA variation in the  
northern flicker (*Colaptes auratus*, Aves). *Mol. Biol. Evol.* **8**, 327-344 (1991).
- 508 39 Moore, W. S. & Buchanan, D. B. Stability of the northern flicker hybrid zone in  
historical times: implications for adaptive speciation theory. *Evolution* **39**, 135-  
510 151 (1985).
- 40 Moore, W. S. Random mating in the northern flicker hybrid zone: implications for  
512 the evolution of bright and contrasting plumage patterns in birds. *Evolution* **41**,  
539-546 (1987).
- 514 41 Aguillon, S. M. & Lovette, I. J. Change the specific/subspecific/morphological  
group name of the Red-shafted Flicker from *cafer* to *lathamii*. *AOS North*  
516 *American Classification Committee* **2019-A-10**, 66-71 (2019).
- 42 Mundy, N. I. *et al.* Red carotenoid coloration in the zebra finch is controlled by a  
518 Cytochrome P450 gene cluster. *Curr. Biol.* **26**, 1435-1440 (2016).
- 43 Hooper, D. M., Griffith, S. C. & Price, T. D. Sex chromosome inversions enforce  
520 reproductive isolation across an avian hybrid zone. *Mol. Ecol.* **28**, 1246-1262  
(2019).
- 522 44 Kirschel, A. *et al.* CYP2J19 mediates carotenoid colour introgression across a  
natural avian hybrid zone. Preprint at  
524 <https://doi.org/10.22541/au.158880215.54508683/v2> (2020).



- 45 Twyman, H., Prager, M., Mundy, N. I. & Andersson, S. Expression of a  
526 carotenoid-modifying gene and evolution of red coloration in weaverbirds  
(Ploceidae). *Mol. Ecol.* **27**, 449-458 (2018).
- 528 46 Hill, G. E. & McGraw, K. J. *Bird Coloration: Mechanisms and Measurements*. Vol.  
1 (Harvard University Press, 2006).
- 530 47 Test, F. H. The nature of red, yellow, and orange pigments in woodpeckers of the  
genus *Colaptes*. *Univ. Calif. Publ. Zool.* **46**, 371-390 (1942).
- 532 48 Hofmann, C. M., McGraw, K. J., Cronin, T. W. & Omland, K. E. Melanin  
coloration in New World orioles I: carotenoid masking and pigment dichromatism  
534 in the orchard oriole complex. *J. Avian Biol.* **38**, 163-171 (2007).
- 49 McGraw, K. J., Wakamatsu, K., Clark, A. B. & Yasukawa, K. Red-winged  
536 blackbirds *Agelaius phoeniceus* use carotenoids and melanin pigments to color  
their epaulets. *J. Avian Biol.* **35**, 543-550 (2004).
- 538 50 Bonser, R. H. C. Melanin and the abrasion resistance of feathers. *Condor* **97**,  
590-591 (1995).
- 540 51 Kose, M. & Møller, A. P. Sexual selection, feather breakage and parasites: the  
importance of white spots in the tail of the barn swallow (*Hirundo rustica*). *Behav.*  
542 *Ecol. Sociobiol.* **45**, 430-436 (1999).
- 52 Ward, J. M., Blount, J. D., Ruxton, G. D. & Houston, D. C. The adaptive  
544 significance of dark plumage for birds in desert environments. *Ardea* **90**, 311-323  
(2002).
- 546 53 Peele, A. M., Burt, E. H., Jr., Schroeder, M. R. & Greenberg, R. S. Dark color of  
the coastal plain swamp sparrow (*Melospiza georgiana nigrescens*) may be an

548 evolutionary response to occurrence and abundance of salt-tolerant feather-  
degrading bacillin in its plumage. *Auk* **126**, 531-535 (2009).

550 54 Gnerre, S. *et al.* High-quality draft assemblies of mammalian genomes from  
massively parallel sequence data. *Proc. Natl. Acad. Sci. USA* **108**, 1513-1518  
552 (2011).

55 Gurevich, A., Saveliev, V., Vyahhi, N. & Tesler, G. QUAST: quality assessment  
554 tool for genome assemblies. *Bioinformatics* **29**, 1072-1075 (2013).

56 Simão, F. A., Waterhouse, R. M., Ioannidis, P., Kriventseva, E. V. & Zdobnov, E.  
556 M. BUSCO: assessing genome assembly and annotation completeness with  
single-copy orthologs. *Bioinformatics* **31**, 3210-3212 (2015).

558 57 Aken, B. L. *et al.* Ensembl 2017. *Nucleic Acids Res.* **45**, D635-D642 (2017).

58 Grabherr, M. G. *et al.* Genome-wide synteny through highly sensitive sequence  
560 alignment: Satsuma. *Bioinformatics* **26**, 1145-1151 (2010).

59 Cantarel, B. L. *et al.* MAKER: an easy-to-use annotation pipeline designed for  
562 emerging model organism genomes. *Genome Res.* **18**, 188-196 (2008).

60 RepeatModeler Open-1.0 (2008).

564 61 RepeatMasker Open-4.0 (2013).

62 Altschul, S. F., Gish, W., Miller, W., Myers, E. W. & Lipman, D. J. Basic Local  
566 Alignment Search Tool. *J. Mol. Biol.* **215**, 403-410 (1990).

63 Lindgreen, S. AdapterRemoval: easy cleaning of next-generation sequencing  
568 reads. *BMC Res. Notes* **5**, 337 (2012).

64 Langmead, B. & Salzberg, S. L. Fast gapped-read alignment with Bowtie 2. *Nat.*  
570 *Methods* **9**, 357-359 (2012).

65 Okonechnikov, K., Conesa, A. & Grcia-Alcalde, F. Qualimap 2: advanced multi-  
572 sample quality control for high-throughput sequencing data. *Bioinformatics* **32**,  
292-294 (2016).

574 66 Li, H. *et al.* The Sequence Alignment/Map format and SAMtools. *Bioinformatics*  
**25**, 2078-2079 (2009).

576 67 McKenna, A. *et al.* The Genome Analysis Toolkit: a MapReduce framework for  
analyzing next-generation DNA sequencing data. *Genome Res.* **20**, 1297-1303  
578 (2010).

68 Korneliussen, T. S., Albrechtsen, A. & Nielsen, R. ANGSD: Analysis of Next  
580 Generation Sequencing Data. *BMC Bioinformatics* **15**, 356 (2014).

69 Zheng, X. *et al.* A high-performance computing toolset for relatedness and  
582 principal component analysis of SNP data. *Bioinformatics* **28**, 3326-3328 (2012).

70 R: A language and environment for statistical computing (R Foundation for  
584 Statistical Computing, Vienna, Austria, 2018).

71 Danecek, P. *et al.* The variant call format and VCFtools. *Bioinformatics* **27**, 2156-  
586 2158 (2011).

72 Turner, S. D. qqman: an R package for visualizing GWAS results using Q-Q and  
588 manhattan plots. Preprint at <https://doi.org/10.1101/005165> (2014).

73 Zhou, X. & Stephens, M. Genome-wide efficient mixed-model analysis for  
590 association studies. *Nat. Genet.* **44**, 821-824 (2012).

74 Browning, S. R. & Browning, B. L. Rapid and accurate haplotype phasing and  
592 missing-data inference for whole-genome association studies by use of localized  
haplotype clustering. *Am. J. Hum. Genet.* **81**, 1084-1097 (2007).

594 75 Purcell, S. *et al.* PLINK: a toolset for whole-genome association and population-  
based linkage analysis. *Am. J. Hum. Genet.* **81**, 559-575 (2007).

596 76 Kearse, M. *et al.* Geneious Basic: an integrated and extendable desktop software  
platform for the organization and analysis of sequence data. *Bioinformatics* **28**,  
598 1647-1649 (2012).

77 UniProt Consortium. UniProt: a worldwide hub of protein knowledge. *Nucleic*  
600 *Acids Res.* **47**, D506-D515 (2019).

## FIGURES

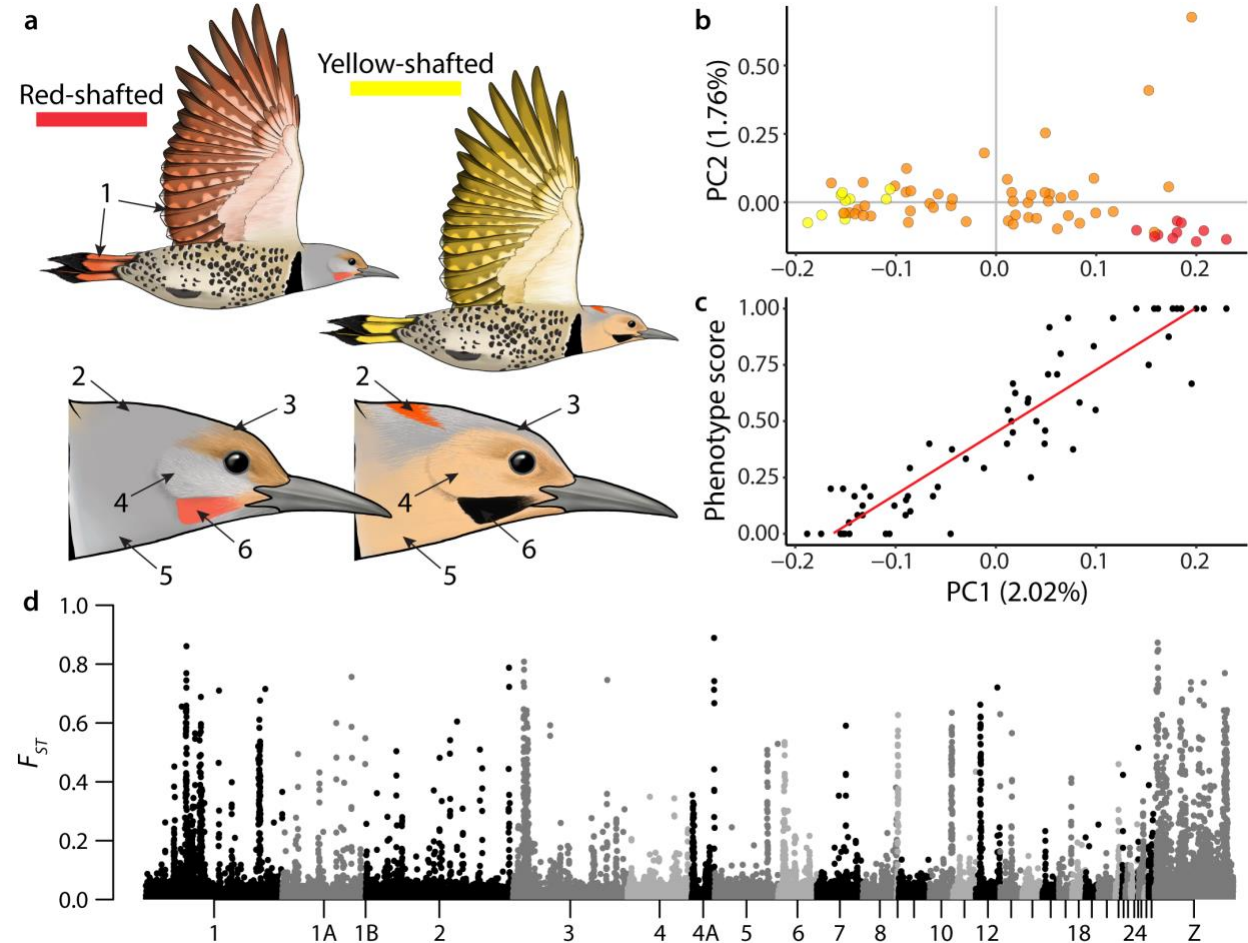

**Fig. 1 | Flicker plumage differences and genomic differentiation.** **a**, Coloration differences between red-shafted and yellow-shafted flickers: (1) wings and tail (the eponymous “shaft”), (2) nuchal patch, (3) crown, (4) ear coverts, (5) throat, and (6) male malar stripe. Pigmentation is based on carotenoids (wings and tail, nuchal patch), melanins (crown, ear coverts, throat), and both carotenoids and melanins (male malar stripe). Illustrations by Megan Bishop. **b**, Principal component analysis (PCA) separately clusters yellow-shafted (yellow points), red-shafted (red points), and hybrid (orange points) flickers using the dataset of approximately 8.5 million genome-wide SNPs. **c**, PC1 is significantly associated with overall phenotype score ( $\rho = 0.93$ ,  $P < 2.2 \times 10^{-16}$ ),

where variation ranges from 0 for pure yellow-shafted flickers to 1 for pure red-shafted

614 flickers. **d**, The distribution of genetic differentiation ( $F_{ST}$ ) between allopatric yellow-  
 shafted flickers and allopatric red-shafted flickers across the whole genome. Individual  
 616 points show the weighted mean  $F_{ST}$  for 25kb windows. Chromosome positions are  
 based on alignment to the zebra finch genome.

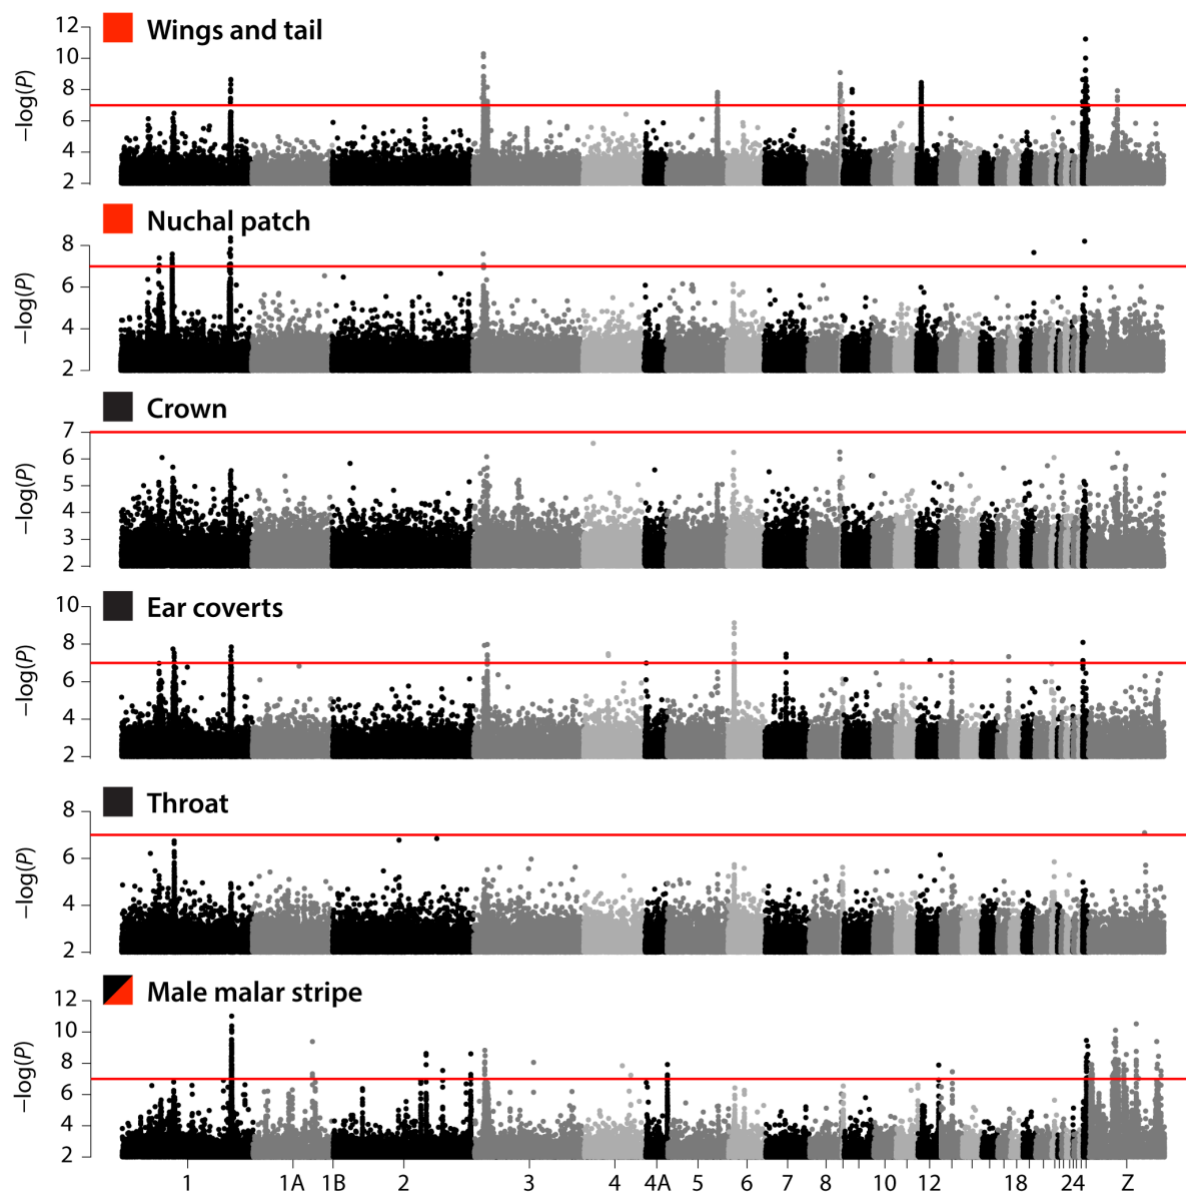

**Fig. 2 | Associations between genomic SNPs and flicker plumage differences.**

Results from the genome-wide associations (GWAs) of hybrid flickers comparing individual SNPs with coloration differences in the six plumage patches. Pigment type is indicated by the square next to the trait name (red = carotenoid, black = melanin, red and black = carotenoid and melanin). Some peaks of significant SNPs are present in GWAs of multiple phenotypic traits, while other peaks are unique to a single GWA, suggesting multiple mechanisms influence coloration in flickers. The red line represents

626 the significance threshold of  $-\log_{10}(P) = 7$ . Chromosome positions are based on  
 alignment to the zebra finch genome. For visualization purposes we show only points  
 628 with  $-\log_{10}(P) > 2$ .



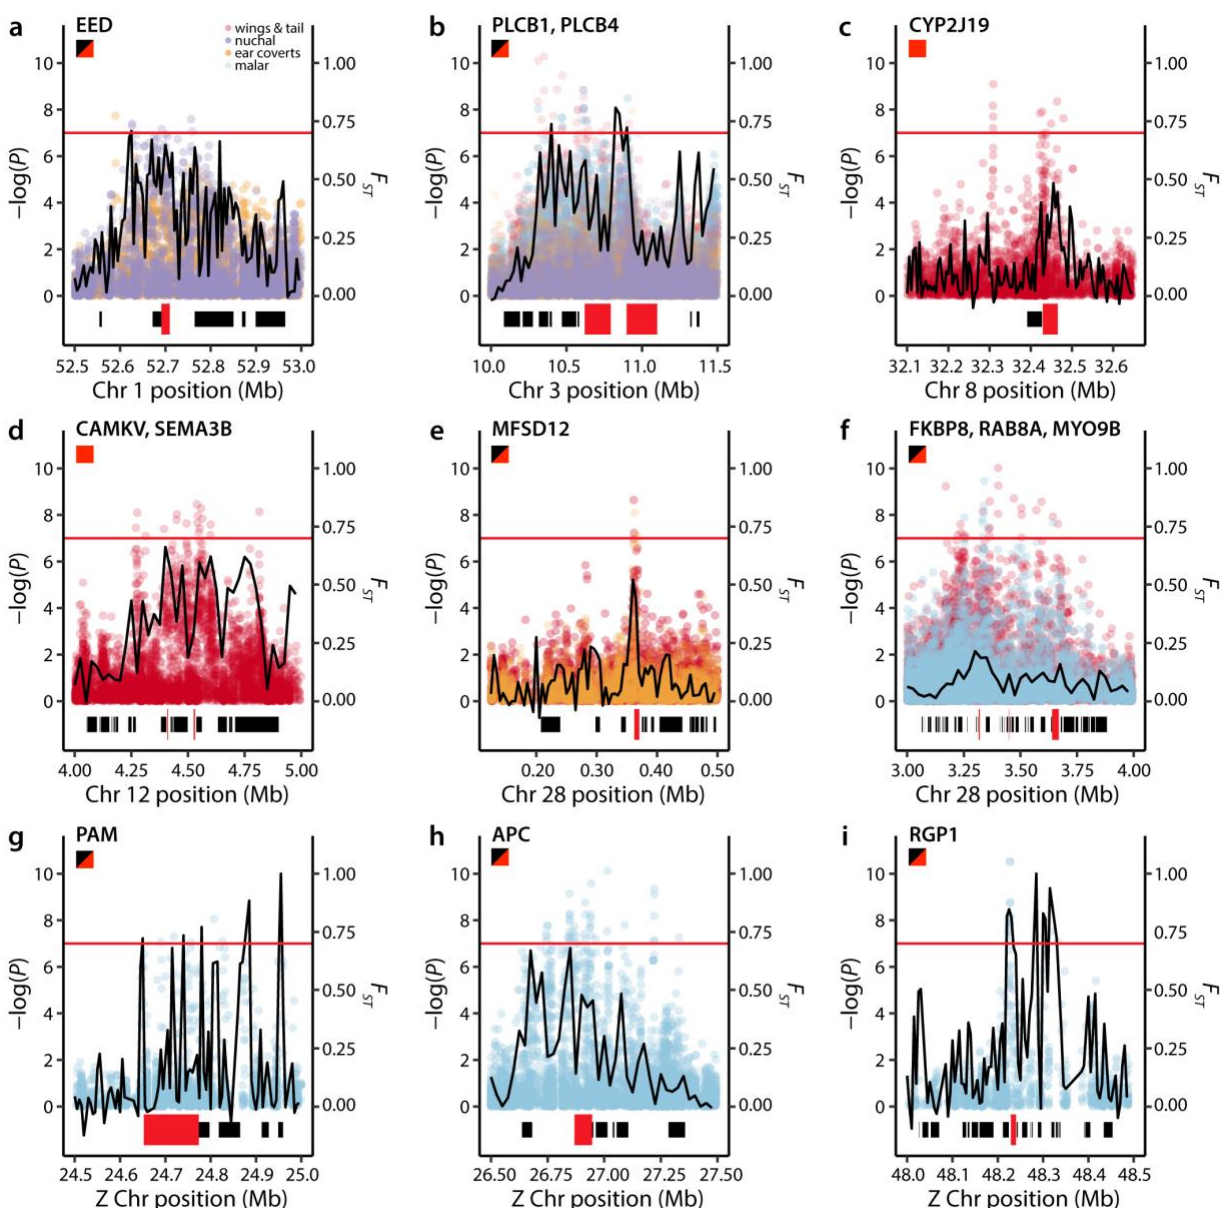

**Fig. 3 | GWA and  $F_{ST}$  patterns around candidate coloration genes.** Patterns of genetic differentiation and GWA significance around nine genomic regions of interest containing 13 candidate coloration genes (Table 1). Significance values from the GWA analyses are shown as points colored by the analyses they were identified in (legend in panel **a**). The horizontal red lines indicate the GWA significance threshold of  $-\log_{10}(P) = 7$ . Weighted mean  $F_{ST}$  between allopatric red-shafted and allopatric yellow-shafted

636 flickers estimated in 25kb (**b, d, f, h**) or 5kb (**a, c, e, g, i**) windows are shown as black  
lines in each panel. Genes contained within the plotted area are shown as bars at the  
638 bottom of each panel, with the red bars indicating the locations of focal genes. When  
multiple focal genes are located within a single panel, they are listed at the top of the  
640 panel in the order of their physical location (from left to right). Pigment types of the  
trait(s) significantly associated with the genomic region are indicated by the squares  
642 under the gene names (red = carotenoid, black = melanin, red and black = carotenoid  
and melanin). Chromosome positions are based on alignment to the zebra finch  
644 genome.

## TABLES

**Table 1 | Candidate coloration genes**

| Gene    | Fig | Chrom | Associated Trait(s)                                                                                                          | Rationale                                                      |
|---------|-----|-------|------------------------------------------------------------------------------------------------------------------------------|----------------------------------------------------------------|
| EED     | 3a  | 1     |  ear coverts, nuchal                        | known melanin genes <sup>8</sup>                               |
| PLCB1   | 3b  | 3     |  ear coverts, malar, nuchal, wings and tail | known melanin genes <sup>8</sup>                               |
| PLCB4   | 3b  | 3     |  malar, nuchal, wings and tail              | known melanin genes <sup>8</sup>                               |
| CYP2J19 | 3c  | 8     |  wings and tail                             | known carotenoid genes <sup>6,42</sup>                         |
| CAMKV   | 3d  | 12    |  wings and tail                             | related to known melanin gene family (CAMKs) <sup>8</sup>      |
| SEMA3B  | 3d  | 12    |  wings and tail                             | related to known melanin gene family (SEMA3s) <sup>8</sup>     |
| MFSD12  | 3e  | 28    |  ear coverts, wings and tail                | candidate melanin gene <sup>23,26</sup>                        |
| FKBP8   | 3f  | 28    |  malar, wings and tail                      | known melanin genes <sup>8</sup>                               |
| RAB8A   | 3f  | 28    |  malar, wings and tail                      | related to known melanin gene family (RABs) <sup>8</sup>       |
| MYO9B   | 3f  | 28    |  malar, wings and tail                     | related to known melanin genes (MYO5A, MYO7A) <sup>8</sup>     |
| PAM     | 3g  | Z     |  malar                                    | known melanin genes <sup>8</sup>                               |
| APC     | 3h  | Z     |  malar                                    | known melanin gene, candidate carotenoid genes <sup>8,12</sup> |
| RGP1    | 3i  | Z     |  malar                                    | candidate melanin gene <sup>11</sup>                           |

Pigment types of the trait(s) significantly associated with the genomic region are

indicated by the colored squares (red = carotenoid, black = melanin, red and black = carotenoid and melanin).

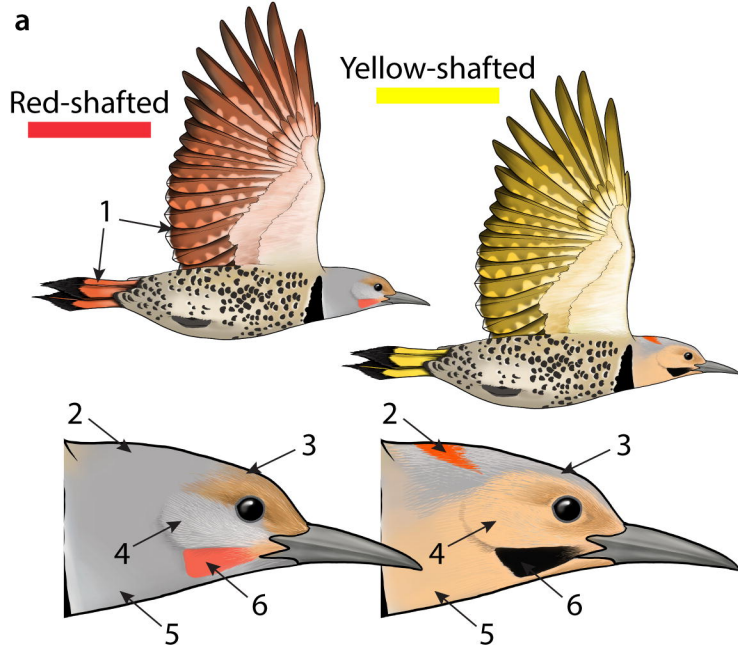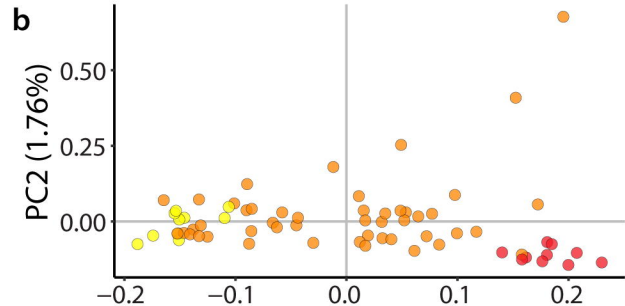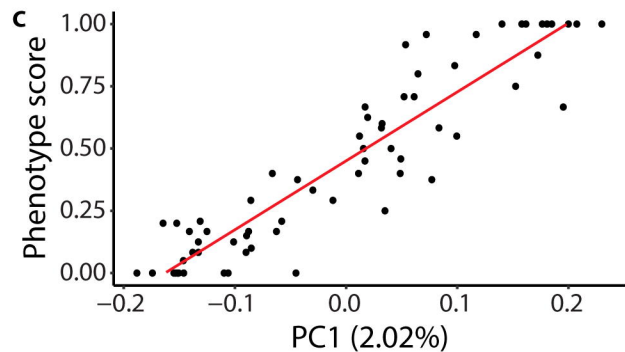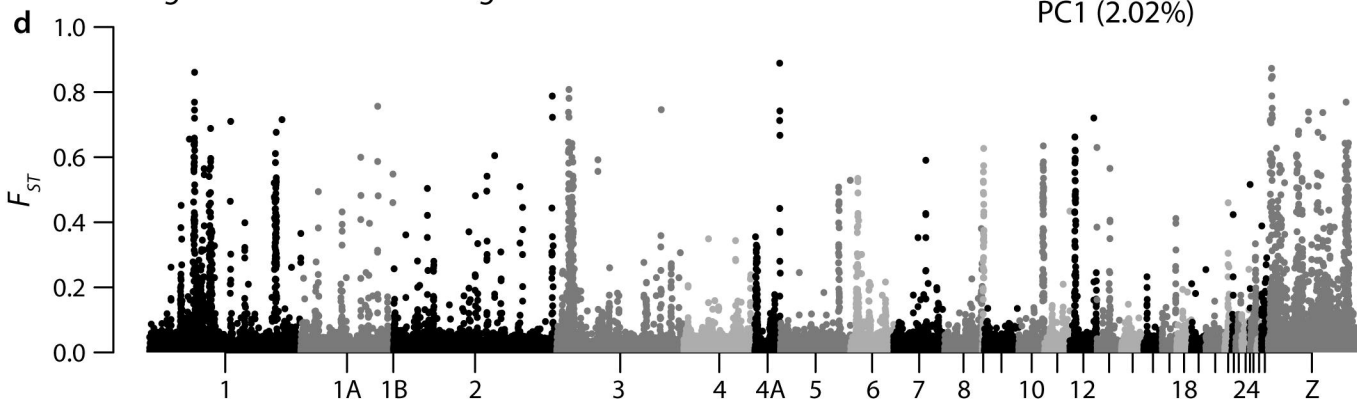

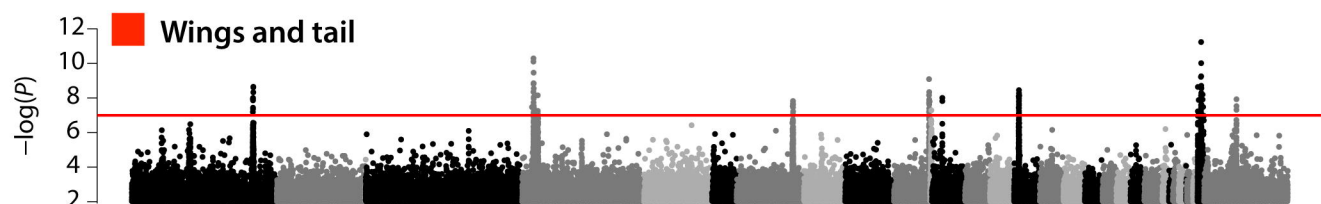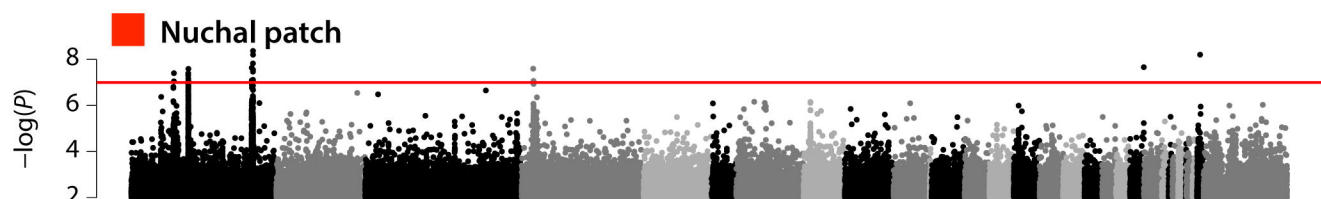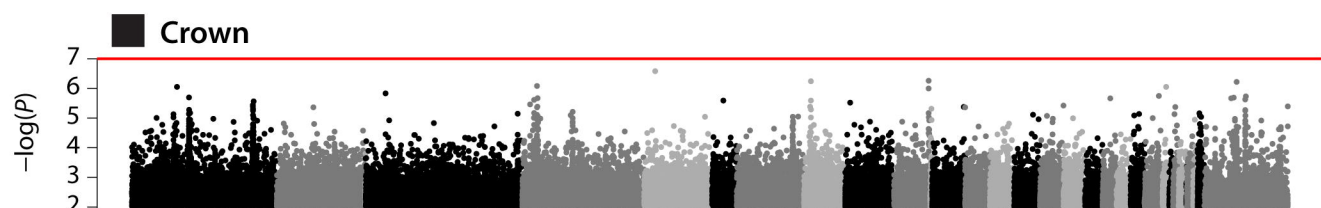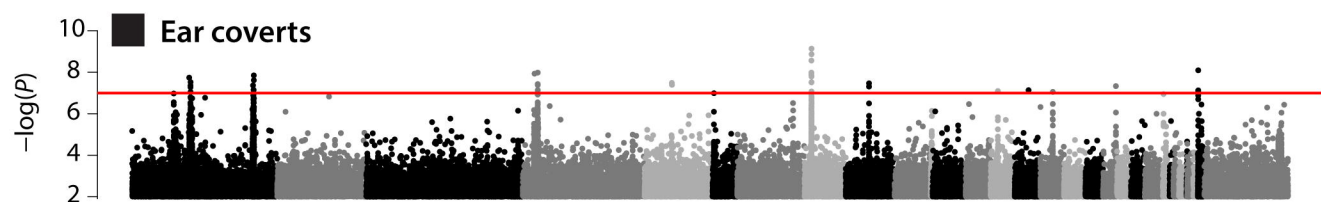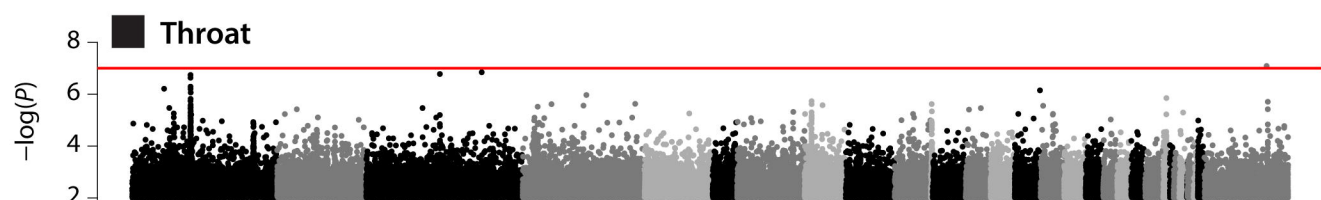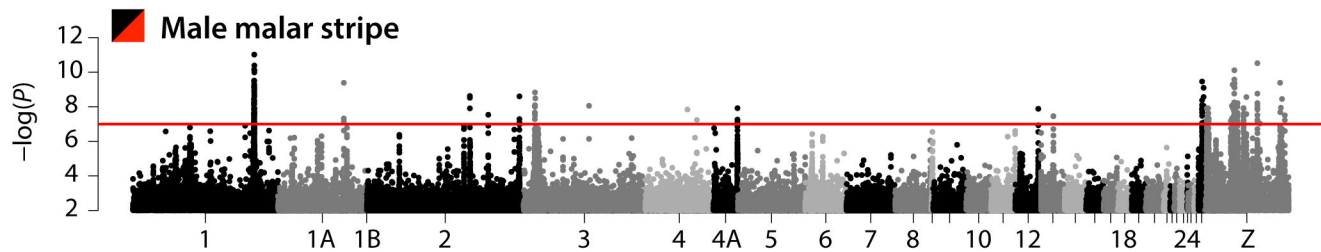



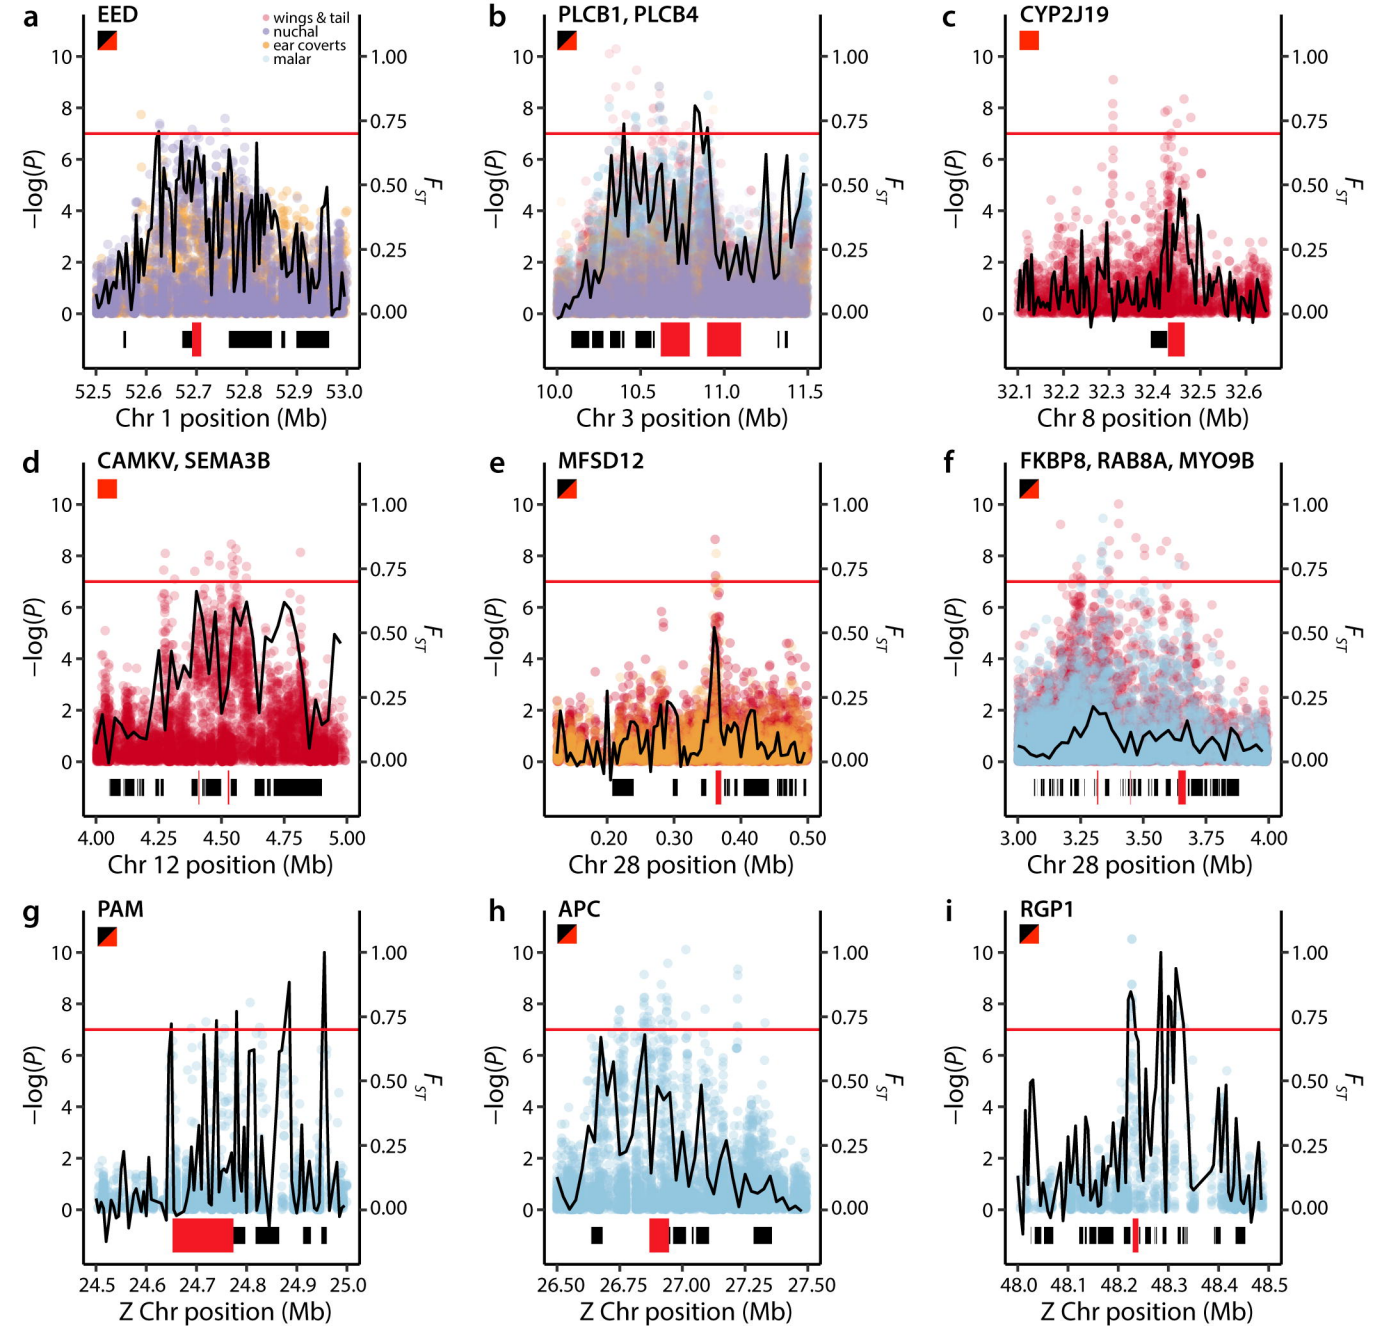

Source: https://www.biorxiv.org/content/10.1101/2020.07.10.197715v1.full.pdf
